# Supplementary material for: Three-dimensional imaging of vascular development in the mouse epididymis
Source: eLife. 2023 Jun 13;12:e82748. doi: 10.7554/eLife.82748 (PMC10264076; doi:10.7554/eLife.82748)
Supplement: Supplementary file 2. [file elife-82748-supp2.xlsx]

## Sheet: Sheet1
Files	Figures	Format	Chanels	Markers	imaging technic	Microscope	Magnification	Analysis	ROI	Protocol
Figure1_datasources.zip	VEGFR3:YFP_Adult	ims	1	VEGFR3:YFP	Binocular	Leica binocular magnifier	1X	na	0	na
Figure1_datasources.zip	VEGFR3-YFP_Adult_Caput.ims	ims	1	VEGFR3:YFP	Binocular	Leica binocular magnifier	1X	na	0	na
Figure1_datasources.zip	VEGFR3-YFP_Adult_Corpus.ims	ims	1	VEGFR3:YFP	Binocular	Leica binocular magnifier	1X	na	0	na
Figure1_datasources.zip	VEGFR3-YFP_Adult_Corpus_Zoom.ims	ims	1	VEGFR3:YFP	Binocular	Leica binocular magnifier	1X	na	0	na
Figure1_datasources.zip	VEGFR3-YFP_Adult_Cauda.ims	ims	1	VEGFR3:YFP	Binocular	Leica binocular magnifier	1X	na	0	na
Figure1_datasources.zip	VEGFR3-YFP_Adult_Cauda_2.ims	ims	1	VEGFR3:YFP	Binocular	Leica binocular magnifier	1X	na	0	na
Figure1_datasources.zip	VEGFR3-YFP_10DPN.ims	ims	1	VEGFR3:YFP	Binocular	Leica binocular magnifier	1X	na	0	na
Figure1_datasources.zip	VEGFR3-YFP_10DPN_2.ims	ims	1	VEGFR3:YFP	Binocular	Leica binocular magnifier	1X	na	0	na
Figure2_datasources.zip	Figure2_Caput_Blood_3lymph.ims	ims	4	VEGFR3:YFP ; PLVAP, LYVE1, PDPN	Ultra microscope 1	LaVision Biotec	4x	na	0	Whole-mount + 3DISCO
Figure2_datasources.zip	Figure2_Cauda_Blood_3lymph.ims	ims	4	VEGFR3:YFP ; PLVAP, LYVE1, PDPN	Ultra microscope 1	LaVision Biotec	4x	na	0	Whole-mount + 3DISCO
Figure2_datasources.zip	Figure2_Caput_4lymph.ims	ims	4	VEGFR3:YFP; LYVE1; PDPN; PROX1	Ultra microscope 1	LaVision Biotec	4x	na	0	Whole-mount + 3DISCO
Figure2_datasources.zip	/Figure2_Cauda_4lymph.ims	ims	4	VEGFR3:YFP; LYVE1; PDPN; PROX1	Ultra microscope 1	LaVision Biotec	4x	na	0	Whole-mount + 3DISCO
Figure3_datasources.zip	Figure3_Caput.ims	ims	2	VEGFR3:YFP, PLVAP	Ultra microscope 1	LaVision Biotec	4x	surface rendering	0	Whole-mount + 3DISCO
Figure3_datasources.zip	Figure3_Cauda.ims	ims	2	VEGFR3:YFP, PLVAP	Ultra microscope 1	LaVision Biotec	4x	surface rendering	0	Whole-mount + 3DISCO
Figure4_datasources.zip	Figure4_Caput_10DPN.ims	ims	3	VEGFR3:YFP; PLVAP, LYVE1	Ultra microscope 1	LaVision Biotec	4x	na	0	Whole-mount + 3DISCO
Figure4_datasources.zip	Figure4_Caput_20DPN.ims	ims	3	VEGFR3:YFP; PLVAP, LYVE2	Ultra microscope 1	LaVision Biotec	4x	na	0	Whole-mount + 3DISCO
Figure4_datasources.zip	Figure4_Caput_30DPN.ims	ims	3	VEGFR3:YFP ; PLVAP, LYVE3	Ultra microscope 1	LaVision Biotec	4x	na	0	Whole-mount + 3DISCO
Figure4_datasources.zip	Figure4_Caput_40DPN.ims	ims	3	VEGFR3:YFP; PLVAP, LYVE4	Ultra microscope 1	LaVision Biotec	4x	na	0	Whole-mount + 3DISCO
figure5_datasouces.zip	VEGF-A_GAPDH/GAPDH rep 1 - 2 VEGFA 2021-03-15 09h14m15s(Chemiluminescence).tif	tif	1	VEGF-A	ChemiDoc	Biorad	na	na	0	WesternBlot
figure5_datasouces.zip	VEGF-A_GAPDH/VEGFA REP 2 2021-03-14 11h00m49s(Chemiluminescence).tif	tif	1	VEGF-A	ChemiDoc	Biorad	na	na	0	WesternBlot
figure5_datasouces.zip	VEGF-A_GAPDH/VEGFA REP 12021-03-14 10h54m25s(Chemiluminescence).jpg	jpg	1	GAPDH	ChemiDoc	Biorad	na	na	0	WesternBlot
figure5_datasouces.zip	Figure5_datasources_VEGFA.pdf	pdf	1	VEGFA/GAPDH	ChemiDoc	Biorad	na	na	0	WesternBlot
figure5_datasouces.zip	VEGF-C_GAPDH/GAPDH REP_ 1&2 For VEGFC 2020-12-06 13h28m24s(Chemiluminescence).tif	tif	1	VEGF-C	ChemiDoc	Biorad	na	na	0	WesternBlot
figure5_datasouces.zip	VEGF-C_GAPDH/VEGFC REP_ 1&2 2020-12-06 09h47m27s(Chemiluminescence).tif	tif	1	GAPDH	ChemiDoc	Biorad	na	na	0	WesternBlot
figure5_datasouces.zip	Figure5_datasources_VEGFC.pdf	pdf	1	VEGFC/GAPDH	ChemiDoc	Biorad	na	na	0	WesternBlot
figure5_datasouces.zip	VEGF-D_GAPDH/GAPDH REP 1& 2 for VEGFD 2020-12-06 13h21m38s(Chemiluminescence).jpg	jpg	1	VEGF-D	ChemiDoc	Biorad	na	na	0	WesternBlot
figure5_datasouces.zip	VEGF-D_GAPDH/VEGFD REP 1&2 2020-12-06 09h31m01s(Chemiluminescence).jpg	jpg	1	GAPDH	ChemiDoc	Biorad	na	na	0	WesternBlot
figure5_datasouces.zip	Figure5_datasources_VEGFD.pdf	pdf	1	VEGFD/GAPDH	ChemiDoc	Biorad	na	na	0	WesternBlot
figure5_datasouces.zip	/VEGFR3_GAPDH/GAPDH REP 1&2 for VEGFR3 2020-12-07 08h21m33s(Chemiluminescence).tif	tif	1	VEGFR3	ChemiDoc	Biorad	na	na	0	WesternBlot
figure5_datasouces.zip	VEGFR3_GAPDH/VEFR3 REP 1&2 Cut gel_ 2020-12-07 08h58m29s(Chemiluminescence).tif	tif	1	VEGFR3	ChemiDoc	Biorad	na	na	0	WesternBlot
figure5_datasouces.zip	VEGFR3_GAPDH/VEGFR3 Rep 1&2 Whole gel 2020-12-07 08h25m38s(Chemiluminescence).jpg	jpg	1	GAPDH	ChemiDoc	Biorad	na	na	0	WesternBlot
figure5_datasouces.zip	Figure5_datasources_VEGFR3.pdf	pdf	1	VEGFR3/GAPDH	ChemiDoc	Biorad	na	na	0	WesternBlot
figure5_datasouces.zip	Figure5_Covariance.xlsx	xlsx	na	na	na	na	na	na	0	stats
figure6_datasources.zip	Figure6_A_VEGFR2.ims	ims	2	VEGFR2; Hoechst	Axioimager Z1	Zeiss	10x	na	0	Paraffin, Immunofluorescence
figure6_datasources.zip	Figure6_A_VEGF-A_Organ_Scan.czi	czi	2	2VEGF-A; Hoechst	Axioscan	Zeiss	20x	na	0	Paraffin, Immunofluorescence
figure6_datasources.zip	Figure6_VEGF-A_Caput.ims	ims	2	VEGFR3:YFP; VEGF-A; Hoechst	Confocal	Leica	40x	na	0	Paraffin, Immunofluorescence
figure6_datasources.zip	Figure6_VEGF-A_Corpus.ims	ims	2	VEGFR3:YFP; VEGF-A; Hoechst	Confocal	Leica	40x	na	0	Paraffin, Immunofluorescence
figure6_datasources.zip	Figure6_VEGF-A_IS.ims	ims	2	VEGFR3:YFP; VEGF-A; Hoechst	Confocal	Leica	40x	na	0	Paraffin, Immunofluorescence
figure6_datasources.zip	Figure6_VEGF-A_Cauda.ims	ims	2	VEGFR3:YFP; VEGF-A; Hoechst	Confocal	Leica	40x	na	0	Paraffin, Immunofluorescence
figure6_datasources.zip	Figure6_B1_VEGF-C_VEGF-D_Organ_Scan.czi	czi	3	2VEGF-C; VEGF-D; Hoechst	Axioscan	Zeiss	20x	na	0	Paraffin, Immunofluorescence
figure6_datasources.zip	Figure6_B2_VEGF-C_VEGF-D. ims	ims	3	2VEGF-C; VEGF-D; Hoechst	Confocal	Leica	40x	na	0	Paraffin, Immunofluorescence
figure6_datasources.zip	Figure6_B3_VEGF-C_VEGF-D.ims	ims	3	2VEGF-C; VEGF-D; Hoechst	Confocal	Leica	40x	na	0	Paraffin, Immunofluorescence
figure6_datasources.zip	Figure6_B4_VEGF-C_VEGF-D.ims	ims	3	2VEGF-C; VEGF-D; Hoechst	Confocal	Leica	40x	na	0	Paraffin, Immunofluorescence
figure6_datasources.zip	Figure6_B5_VEGF-C_VEGF-D.ims	ims	3	2VEGF-C; VEGF-D; Hoechst	Confocal	Leica	40x	na	0	Paraffin, Immunofluorescence
figure6_datasources.zip	Figure6_B6_VEGF-C_VEGF-D.ims	ims	3	2VEGF-C; VEGF-D; Hoechst	Confocal	Leica	40x	na	0	Paraffin, Immunofluorescence
figure6_datasources.zip	Figure6_B7_VEGF-C_VEGF-D.ims	ims	3	2VEGF-C; VEGF-D; Hoechst	Confocal	Leica	40x	na	0	Paraffin, Immunofluorescence
figure6_datasources.zip	Figure6_B8_VEGF-C_VEGF-D.ims	ims	3	2VEGF-C; VEGF-D; Hoechst	Confocal	Leica	40x	na	0	Paraffin, Immunofluorescence
figure6_datasources.zip	Figure6_B9_Control.ims	ims	3	A488 ; A555 ; Hoechst	Confocal	Leica	40x	na	0	Paraffin, Immunofluorescence
Figure7_datasources.zip	Figure 7A.ims	ims	4	VEGFR3:YFP; LYVE1; PROX1; PDPN	Ultra microscope 1	LaVision Biotec	4X	Surface rendering	1	Whole-mount + 3DISCO
Figure7_datasources.zip	Figure7B_10DPN.ims	ims	4	VEGFR3:YFP; LYVE1; PDPN; PLVAP	Ultra microscope 2	LaVision Biotec	20X	Surface rendering	1	Whole-mount + 3DISCO
Figure7_datasources.zip	Figure7B_20DPN.ims	ims	4	VEGFR3:YFP; LYVE1; PDPN; PLVAP	Ultra microscope 3	LaVision Biotec	20X	Surface rendering	1	Whole-mount + 3DISCO
Figure7_datasources.zip	Figure7B_30DPN.ims	ims	4	VEGFR3:YFP; LYVE1; PDPN; PLVAP	Ultra microscope 4	LaVision Biotec	20X	Surface rendering	1	Whole-mount + 3DISCO
Figure7_datasources.zip	Figure7B_40DPN.ims	ims	4	VEGFR3:YFP; LYVE1; PDPN; PLVAP	Ultra microscope 5	LaVision Biotec	20X	Surface rendering	1	Whole-mount + 3DISCO
Figure7_datasources.zip	Figure7B_Adult.ims	ims	4	VEGFR3:YFP; LYVE1; PDPN; PLVAP	Ultra microscope 6	LaVision Biotec	20X	Surface rendering	1	Whole-mount + 3DISCO
Figure11_datasources.zip	Figure11_Epid_Hybrid_Vessels_Markers.xlsx	xlsx	na	na	na	na	na	na	na	na
Figure2_fig-suppl1_datasources.zip	Figure2-figSuppl1A.ims	ims	3	VEGFR3:YFP; VEGFR3; Hoechst	Confocal	Leica	40x	na	0	Paraffin, Immunofluorescence
Figure2_fig-suppl1_datasources.zip	Figure2-figSuppl1B.ims	ims	5	PLVAP, VEGFR3:YFP; LYVE1; PDPN ; Hoechst	Confocal	Leica	40x	na	0	Paraffin, Immunofluorescence
Figure2_fig-suppl1_datasources.zip	Figure2-figSuppl1C.ims	ims	4	A488; A555; A647; Chromeo494	Ultra microscope 1	LaVision Biotec	4X	Surface rendering	0	Whole-mount + 3DISCO
Figure2_figSuppl2_datasources.zip	Figure2-figSuppl2_epididymis.ims	ims	2	VEGFR3:YFP; LYVE1	Ultra microscope 1	LaVision Biotec	2X	Surface rendering	0	Whole-mount + 3DISCO
Figure2-figSuppl3_datasources.zip	Figure2-figSuppl3A_Caput_4lymphatics.ims	ims	4	VEGFR3:YFP; LYVE1; PDPN; PROX1	Ultra microscope 1	LaVision Biotec	4x	na	0	Whole-mount + 3DISCO
Figure2-figSuppl3_datasources.zip	Figure2-figSuppl3A_Caput_Blood_3Lymph.ims	ims	4	VEGFR3:YFP; PLVAP, LYVE1,PDPN	Ultra microscope 1	LaVision Biotec	4x	na	0	Whole-mount + 3DISCO
Figure2-figSuppl3_datasources.zip	Figure2-figSuppl3A_Cauda_4Lymphatics.ims	ims	4	VEGFR3:YFP; LYVE1; PDPN; PROX1	Ultra microscope 1	LaVision Biotec	4x	na	0	Whole-mount + 3DISCO
Figure2-figSuppl3_datasources.zip	Figure2-figSuppl3A_Cauda_Blood_3lymph.ims	ims	4	VEGFR3:YFP; PLVAP, LYVE1,PDPN	Ultra microscope 1	LaVision Biotec	12X	na	0	Whole-mount + 3DISCO
Figure2-figSuppl3_datasources.zip	Figure2-Suppl3B_IS_12X Z0000.ims	ims	2	VEGFR3:YFP; PLVAP	Ultra microscope 1	LaVision Biotec	4x	Surface rendering	1	Whole-mount + 3DISCO
Figure4_fig-suppl1_datasources_partA.zip	Figure4_Cauda_10DPN.ims	ims	4	VEGFR3:YFP; PLVAP, LYVE1, PDPN	Ultra microscope 1	LaVision Biotec	4x	na	0	Whole-mount + 3DISCO
Figure4_fig-suppl1_datasources_partA.zip	Figure4_Cauda_20DPN.ims	ims	4	VEGFR3:YFP; PLVAP, LYVE1, PDPN	Ultra microscope 1	LaVision Biotec	4x	na	0	Whole-mount + 3DISCO
figure4_figSuppl1_datasources_partB.zip	Figure4_Cauda_30DPN.ims	ims	4	VEGFR3:YFP; PLVAP, LYVE1, PDPN	Ultra microscope 1	LaVision Biotec	4x	na	0	Whole-mount + 3DISCO
figure4_figSuppl1_datasources_partB.zip	Figure4_Cauda_40DPN.ims	ims	4	VEGFR3:YFP ; PLVAP, LYVE1, PDPN	Ultra microscope 1	LaVision Biotec	4x	na	0	Whole-mount + 3DISCO
Figures2-Videos_Datasources.zip	Figure2_Video1.ims	ims	4	PLVAP, VEGFR3:YFP; LYVE1; PDPN	Ultra microscope 1	LaVision Biotec	4x	na	0	Whole-mount + 3DISCO
Figures2-Videos_Datasources.zip	Figure2-Video2.ims	ims	3	PLVAP, VEGFR3:YFP; PDPN	Ultra microscope 1	LaVision Biotec	4x	na	0	Whole-mount + 3DISCO
Figures2-Videos_Datasources.zip	Figure2-Video3.ims	ims	4	PLVAP, VEGFR3:YFP; LYVE1; PDPN	Ultra microscope 1	LaVision Biotec	4x	na	0	Whole-mount + 3DISCO
